# Supplementary material for: Unveiling the phylogeny of Contracaecum jorgei (Nematoda, Anisakidae) parasitizing Ardea cocoi (Aves, Ardeidae) in Argentina based on an integrative analysis
Source: Research Square preprint supplement (doi:10.21203/rs.3.rs-4450708/v1), 2024-06-07
Supplement: Supplementary file 1 [file 93a7288eff5978062a82ff7b.docx]

**Table 3b:** Uncorrected p-distances of the ITS-1 region among *Contracaecum* spp. used in this study and expressed in percentage. New reported sequences in bold.

|  |  | **1** | 2 | 3 | 4 | 5 | 6 | 7 | 8 | 9 | 10 | 11 | 12 | 13 | 14 |
| --- | --- | --- | --- | --- | --- | --- | --- | --- | --- | --- | --- | --- | --- | --- | --- |
| **1** | ***C. jorgei*** |  |  |  |  |  |  |  |  |  |  |  |  |  |  |
| 2 | *C. pyripapillatum* | **15** |  |  |  |  |  |  |  |  |  |  |  |  |  |
| 3 | *C. multipapillatum* | **14** | 3 |  |  |  |  |  |  |  |  |  |  |  |  |
| 4 | *C. gibsoni* | **14** | 3 | 0 |  |  |  |  |  |  |  |  |  |  |  |
| 5 | *C. quadripapillatum* | **11** | 13 | 12 | 13 |  |  |  |  |  |  |  |  |  |  |
| 6 | *C. ogmorhini* | **20** | 21 | 21 | 21 | 19 |  |  |  |  |  |  |  |  |  |
| 7 | *C. eudyptulae* | **20** | 20 | 21 | 21 | 18 | 1 |  |  |  |  |  |  |  |  |
| 8 | *C. variegatum* | **20** | 20 | 20 | 20 | 18 | 1 | 1 |  |  |  |  |  |  |  |
| 9 | *C. chubutensis* | **20** | 21 | 20 | 20 | 18 | 2 | 1 | 2 |  |  |  |  |  |  |
| 10 | *Contracaecum sp.* | **20** | 22 | 21 | 21 | 18 | 2 | 2 | 2 | 0 |  |  |  |  |  |
| 11 | *C. australe* | **20** | 22 | 21 | 21 | 18 | 2 | 2 | 2 | 0 | 0 |  |  |  |  |
| 12 | *C. septentrionale* | **20** | 21 | 20 | 20 | 18 | 3 | 2 | 3 | 2 | 3 | 3 |  |  |  |
| 13 | *C. microcephalum* | **20** | 20 | 19 | 19 | 19 | 8 | 8 | 7 | 7 | 7 | 7 | 7 |  |  |
| 14 | *C. osculatum* | **20** | 21 | 20 | 20 | 20 | 12 | 11 | 12 | 11 | 11 | 11 | 10 | 12 |  |
| 15 | *C. bancrofti* | **17** | 20 | 18 | 18 | 16 | 10 | 9 | 10 | 9 | 8 | 8 | 8 | 9 | 10 |
