# Supplementary material for: Unveiling the phylogeny of Contracaecum jorgei (Nematoda, Anisakidae) parasitizing Ardea cocoi (Aves, Ardeidae) in Argentina based on an integrative analysis
Source: Research Square preprint supplement (doi:10.21203/rs.3.rs-4450708/v1), 2024-06-07
Supplement: Supplementary file 2 [file a14e4f22622828d92b34ced2.docx]

Table 1. Records of *Contracaecum* species parasitizing Ardeidae in Argentina, Central and South America.

| ***Contracaecum* species** | **Definitive Hosts** | **Sampling Site** | **References** | **Genbank accession number** |
| --- | --- | --- | --- | --- |
| ***C. andersoni*** | *Egretta caerulea* (Ardeidae) | Georgetown, British Guiana | Vevers, 1923 |  |
| ***C. crenulatum*** | *Cancroma cochlearia* (Ardeidae) | Trombetas River, Óbidos, Brazil | Schuurmans-Stekhoven, 1937 |  |
| ***C. microcephalum*** | *Butorides striatus* (Ardeidae) |  |  | Cox-2: EF122206, |
|  | *Casmerodius albus (Ardea egretta) egretta* (Ardeidae) | Seven localities, Brazil | Vicente et al., 1995 | EF122207, EF513514, EF513515, EF513516, EU852350 |
|  | *Egretta (Leucophoyx) thula* |  |  |  |
|  | *Ardea (=Casmerodius) alba egretta* (Ardeidae) | Rio Grande do Sul, Brazil | Hartwich, 1964 |  |
| *Butorides virescens* | Brazil |  |
| *Ardea (=Casmerodius) alba egretta* (Ardeidae) | La Plata Zoo, Buenos Aires province, Argentina | Boero & Led, 1972 |
| *Nycticorax nycticorax* (Ardeidae) |
| *Ardea cocoi* (Ardeidae) |
| *Ardea (=Casmerodius) alba egretta* (Ardeidae) | Leales, Tucumán province, Argentina | Schuurmans-Stekhoven, 1951 |
| *Nycticorax nycticorax* (Ardeidae) | Chapultepec Zoo, Miguel Hidalgo, Mexico | Caballero & Peregrina, 1938 |
| *Mycteria americana* (Ciconiidae) | Brazil (locality not specified) | Von Drasche, 1882 |
| ***C. multipapillatum*** | *Ardea alba* (Ardeidae) | Costal Lagoon of Celestún, Yucatán, Mexico | Vidal Martínez, 1994 | ITS-1: AM940056, AM940057 AM940058, AM940059 |
| (syn: *C. multipapillosum* Skrjabin, 1916; *C. philomultipapillatum* Labriola & Suriano, 1996; *C. robustum* Chandler, 1935) | *Ardea cocoi* (Ardeidae) | State of Mato Grosso do Sul, Angra dos Reis, State of Rio de Janeiro, Brazil | Vicente et al., 1995 | ITS-2: AM940060 AM940061 |
|  | *Cochlearius cochlearius (=Cancroma cochlearia)*  (Ardeidae) |  |  |  |
|  | *Nycticorax nycticorax hoactli*  (Ardeidae) |  |  |  |
|  | *Ardea alba* (Ardeidae) | Mar Chiquita coastal lagoon, Buenos Aires province, Argentina | Navone et al., 2000 |  |
|  |  | Laguna de Monte, Buenos Aires province, Argentina | Labriola & Suriano, 1996 |  |
|  | *Egretta thula* (Ardeidae) | Laguna de Monte, Buenos Aires province, Argentina | Labriola & Suriano, 1996  Deardoff & Oversteet, 1980 |  |
|  | *Bubulcus ibis* (Ardeidae) | Monte’s Lagoon, Buenos Aires province, Argentina |  |
|  | IH: *Mugil cephalus* (Mugilidae) | Gulf of Mexico |  |
|  | *Pelecanus occidentalis* (Pelecanidae) | Bahía de La Paz, Gulf of California, Mexico | Valles-Vega et al., 2017 |  |
|  | *Nycticorax nycticorax hoactli (Herodigs pileatus)* (Ardeidae) | States of Mato Grosso do Sul and Rio de Janeiro, Brazil | Vicente et al., 1995 |  |
| ***C. plagiaticium*** | *Nycticorax nycticorax hoactli (=naevius)* (Ardeidae) | Montevideo coast, Uruguay | Lent & Freitas, 1948 |  |
|  | *Phalacrocorax brasilianus* (Phalacrocoracidae) | Nature Sanctuary, Rio Cruces, Valdivia, Chile | Torres et al., 2000 |  |
| ***C. rudolphii*** | *Phalacrocorax brasilianus* (Phalacrocoracidae) | Guaíba Lake, Municipality of Guaíba, | Amato et al., 2006 | Cox-2: EF513501, EF513502, EF513503, EF513505, EF558891, EF122202, EF535570, EF558894, EF558896, EF513506, EF513507, EF513509, EU852349, EF014283 |
| (syn: *Contracaecum spiculigerum* (Rudolphi, 1809); *Contracaecum umiu* Yamaguti, 1941) | Rio Grande do Sul, Brazil | Amato et al., 2006  Hartwich, 1964 |
|  | Uruguay (locality not specified) |
|  | Montford lagoon, Cadereyta, Nuevo León, Mexico | Caballero, 1948 |
|  |  |  |
