# Supplementary material for: Unveiling the phylogeny of Contracaecum jorgei (Nematoda, Anisakidae) parasitizing Ardea cocoi (Aves, Ardeidae) in Argentina based on an integrative analysis
Source: Research Square preprint supplement (doi:10.21203/rs.3.rs-4450708/v1), 2024-06-07
Supplement: Supplementary file 3 [file d6687474402ec89a2f8fdce0.docx]

**Table 3c:** Uncorrected p-distances of the ITS-2 region among *Contracaecum* spp. used in this study and expressed in percentage. New reported sequences in bold.

|  |  | **1** | 2 | 3 | 4 | 5 | 6 | 7 | 8 | 9 | 10 | 11 | 12 | 13 |
| --- | --- | --- | --- | --- | --- | --- | --- | --- | --- | --- | --- | --- | --- | --- |
| **1** | ***C. jorgei*** |  |  |  |  |  |  |  |  |  |  |  |  |  |
| 2 | *C. pyripapillatum* | **31** |  |  |  |  |  |  |  |  |  |  |  |  |
| 3 | *C. gibsoni* | **30** | 4 |  |  |  |  |  |  |  |  |  |  |  |
| 4 | *C. quadripapillatum* | **24** | 18 | 18 |  |  |  |  |  |  |  |  |  |  |
| 5 | *C. ogmorhini* | **37** | 39 | 38 | 34 |  |  |  |  |  |  |  |  |  |
| 6 | *C. variegatum* | **37** | 38 | 37 | 34 | 2 |  |  |  |  |  |  |  |  |
| 7 | *C. chubutensis* | **36** | 37 | 36 | 33 | 3 | 2 |  |  |  |  |  |  |  |
| 8 | *C. eudyptulae* | **37** | 37 | 36 | 33 | 3 | 3 | 2 |  |  |  |  |  |  |
| 9 | *C. septentrionale* | **38** | 38 | 38 | 34 | 7 | 7 | 5 | 5 |  |  |  |  |  |
| 10 | *Contracaecum* sp. | **37** | 38 | 37 | 33 | 4 | 4 | 2 | 3 | 6 |  |  |  |  |
| 11 | *C. australe* | **37** | 38 | 37 | 33 | 4 | 4 | 2 | 3 | 6 | 0 |  |  |  |
| 12 | *C. rudolphii* | **36** | 38 | 37 | 33 | 2 | 2 | 2 | 4 | 7 | 2 | 2 |  |  |
| 13 | *C. microcephalum* | **38** | 40 | 38 | 37 | 14 | 14 | 12 | 14 | 12 | 12 | 12 | 12 |  |
| 14 | *C. osculatum* | **34** | 36 | 36 | 34 | 25 | 27 | 24 | 25 | 22 | 25 | 25 | 26 | 23 |
