# Supplementary material for: Unveiling the phylogeny of Contracaecum jorgei (Nematoda, Anisakidae) parasitizing Ardea cocoi (Aves, Ardeidae) in Argentina based on an integrative analysis
Source: Research Square preprint supplement (doi:10.21203/rs.3.rs-4450708/v1), 2024-06-07
Supplement: Supplementary file 4 [file d872d01abf40d5398fe2555e.docx]

**Table 3a:** Uncorrected p-distances of the mtDNA *Cox2* among *Contracaecum* spp. used in this study and expressed in percentage. New reported sequences in bold.

|  |  | **1** | 2 | 3 | 4 | 5 | 6 | 7 | 8 | 9 | 10 | 11 | 12 | 13 | 14 | 15 | 16 | 17 | 18 | 19 | 20 | 21 |
| --- | --- | --- | --- | --- | --- | --- | --- | --- | --- | --- | --- | --- | --- | --- | --- | --- | --- | --- | --- | --- | --- | --- |
| **1** | ***C. jorgei*** |  |  |  |  |  |  |  |  |  |  |  |  |  |  |  |  |  |  |  |  |  |
| 2 | *C. jorgei* | **1** |  |  |  |  |  |  |  |  |  |  |  |  |  |  |  |  |  |  |  |  |
| 3 | *C. multipapillatum* | **2** | 1 |  |  |  |  |  |  |  |  |  |  |  |  |  |  |  |  |  |  |  |
| 4 | *C. aff multipapillatum* EU852348 | **10** | 9 | 9 |  |  |  |  |  |  |  |  |  |  |  |  |  |  |  |  |  |  |
| 5 | *C. overstreeti* | **10** | 10 | 9 | 1 |  |  |  |  |  |  |  |  |  |  |  |  |  |  |  |  |  |
| 6 | *C. multipapillatum* AF179910 | **10** | 11 | 10 | 7 | 8 |  |  |  |  |  |  |  |  |  |  |  |  |  |  |  |  |
| 7 | *C. micropapillatum* | **12** | 12 | 12 | 11 | 11 | 11 |  |  |  |  |  |  |  |  |  |  |  |  |  |  |  |
| 8 | *C. banchofti* | **11** | 11 | 11 | 12 | 12 | 11 | 7 |  |  |  |  |  |  |  |  |  |  |  |  |  |  |
| 9 | *C. obmorhini* | **14** | 13 | 13 | 11 | 11 | 12 | 13 | 13 |  |  |  |  |  |  |  |  |  |  |  |  |  |
| 10 | *C. margolisi* | **14** | 14 | 14 | 12 | 12 | 12 | 14 | 14 | 2 |  |  |  |  |  |  |  |  |  |  |  |  |
| 11 | *C. rudolphii* | **13** | 12 | 12 | 12 | 12 | 12 | 11 | 12 | 8 | 8 |  |  |  |  |  |  |  |  |  |  |  |
| 12 | *Contracaecum* sp. | **14** | 14 | 14 | 12 | 13 | 14 | 12 | 12 | 8 | 8 | 8 |  |  |  |  |  |  |  |  |  |  |
| 13 | *C. chubutensis* | **14** | 14 | 14 | 12 | 12 | 13 | 13 | 13 | 9 | 10 | 8 | 8 |  |  |  |  |  |  |  |  |  |
| 14 | *C. septentrionale* | **12** | 11 | 12 | 11 | 11 | 11 | 11 | 11 | 10 | 11 | 8 | 9 | 6 |  |  |  |  |  |  |  |  |
| 15 | *C. fagherolmi* | **13** | 12 | 12 | 12 | 12 | 11 | 12 | 12 | 11 | 11 | 11 | 9 | 11 | 12 |  |  |  |  |  |  |  |
| 16 | *C. bioccai* | **12** | 11 | 11 | 13 | 13 | 12 | 14 | 13 | 12 | 13 | 11 | 12 | 12 | 12 | 11 |  |  |  |  |  |  |
| 17 | *C. mirounga* | **15** | 14 | 14 | 12 | 13 | 12 | 13 | 12 | 15 | 15 | 14 | 14 | 14 | 14 | 13 | 13 |  |  |  |  |  |
| 18 | *C. radiatum* | **14** | 13 | 13 | 11 | 11 | 11 | 13 | 11 | 13 | 13 | 14 | 15 | 14 | 12 | 12 | 13 | 9 |  |  |  |  |
| 19 | *C. pelagicum* | **15** | 15 | 15 | 15 | 16 | 15 | 13 | 15 | 12 | 12 | 11 | 11 | 11 | 13 | 14 | 11 | 14 | 16 |  |  |  |
| 20 | *C. microcephalum* | **13** | 13 | 13 | 11 | 11 | 11 | 11 | 11 | 14 | 15 | 13 | 14 | 14 | 13 | 12 | 12 | 13 | 12 | 16 |  |  |
| 21 | *C.* aff *multipapillatum* | **15** | 14 | 14 | 12 | 12 | 12 | 13 | 13 | 15 | 16 | 14 | 15 | 15 | 14 | 13 | 14 | 12 | 14 | 14 | 13 |  |
| 22 | *C. osculatum* | **14** | 15 | 15 | 14 | 15 | 13 | 14 | 13 | 15 | 14 | 14 | 15 | 15 | 15 | 14 | 16 | 14 | 15 | 16 | 15 | 15 |
