# Supplementary material for: Unveiling the phylogeny of Contracaecum jorgei (Nematoda, Anisakidae) parasitizing Ardea cocoi (Aves, Ardeidae) in Argentina based on an integrative analysis
Source: Research Square preprint supplement (doi:10.21203/rs.3.rs-4450708/v1), 2024-06-07
Supplement: Supplementary file 5 [file dd0b74ea7884cb824b916a86.docx]

**Table 2**. Morphometric data of *Contracaecum jorgei* parasitizing *Ardea cocoi* from Magdalena, Buenos Aires province, and other related authors’ works. All measurements are expressed in millimetres (mm). Distance to anterior end (dae), (+) Right spicule, (-) Left spicule.

| **References** | Navone et al., 2000 | Boero & Led, 1971 | Garbin et al., 2011 | Biolé at al., 2012 | Sardella et al., 2020 | **Present work** |
| --- | --- | --- | --- | --- | --- | --- |
| **Species** | ***Contracaecum multipapillatum*** | ***Contracaecum microcephalum*** | ***Contracaecum australe*** | ***Contracaecum australe*** | ***Contracaecum jorgei*** | ***Contracaecum jorgei*** |
| **Hosts** | *Ardea (Egretta) alba* | *Nycticorax nycticorax* | *Phalacrocorax brasilianus* | *Phalacrocorax brasilianus* | *Phalacrocorax brasilianus* | *Ardea cocoi* |
| **Locality** |  |  | Santa Helena lagoon, VIII Region,  (Chile) | Córdoba province lagoons  (Argentina) | Pampean lakes, Unión Department, Córdoba province (Argentina) | Magdalena, Buenos Aires province  (Argentina) |
| Mar Chiquita coastal lagoon, Buenos Aires province (Argentina) | Uribelarrea, Buenos Aires province (Argentina) |
| ***Males (n)*** | 10 | - | 10 | 10 | 10 | 10 |
| **Body length (BL)** | 24.35 (20.63–32.34) | 21.00 (20.00 – 22.00) | 23.24 (13.90-28.40) | 24.37 (19.25-27.37) | 15.95 (14.31–20.98) | 17.38 (15.65-22.60) |
| **Maximum body width (MBW)** | 0.67 (0.52–0.76) | - | 0.75 (0.64-0.93) | 0.90 (0.65-1) | 0.38 (0.29–0.59) | 0.47 (0.38-0.71) |
| **Nerve ring (dae)** | 0.40 (0.38–0.43) | 0.60 | 0.63 (0.58-0.68) | 0.35-0.39 | 0.37 (0.29–0.46) | 0.43 (0.30-0.53) |
| **Deirids (dae)** | - | - | 0.65 (0.58-0.79) | 0.35-0.38 | 0.29 (n = 1) | 0.35 (0.30-0.42) |
| **Esophagous length (EL)** | 3.32 (2.60–4.62) | 2.60 | 3.62 (2.62-4.60) | 4.12-4.40 | 2.62 (2.01–3.88) | 2.87 (2.51-3.45) |
| **Intestinal cecum length (ICL)** | 2.59 (1.63–3.38) | 2.016 | 2.41 (1.56-3.24) | 3.57-4.00 | 1.94 (1.19–3.32) | 2.13 (1.65-3.04) |
| **Ventricle length** | 0.19 (0.12–0.23) | - | 0.28 (0.20-0.38) | 0.10-0.15 | 0.05 (0.03–0.09) | 0.10 (0.06-0.17) |
| **Ventricular appendix length (VAL)** | 0.57 (0.47–0.69) | 0.864 | 1.17 (0.87-1.41) | 0.75-0.85 | 0.40 (0.29–0.57) | 0.51 (0.43-0.73) |
| **Spicule lenght (SL) (+)** | 1.01 (0.89–1.11) | 2.376 | 11.97 (9.60-15.88) | 9.20-10.45 | 2.81 (2.28–3.63) | 3.40 (2.90-4.56) |
| **(-)** | - | 2.160 | **-** | - | 2.61 (2.03–3.18) | 3.21 (2.52-4.10) |
| **Tail length (TL)** | 0.14 (0.12–0.16) | - | 0.22 (0.18-0.24) | 0.16 (0.12-0.35) | 0.17 (0.15–0.21) | 0.20 (0.18-0.22) |
| **Precloacal papillae pairs** | 32–93 | 10 | 27-32 | 32-40 | 26 | 28 (24-31) |
| **BL/MBW** | 36.34 | - | 34.12 (28.31-39.12) | 29.61 | 41.97 | 36.97 (35.46-41.10) |
| **BL/SL** | 24.11 | 9.25 | 1.9 (1.41-2.77) | 2 | 5.88 | 5.25 (3.05-6.64) |
| **BL/TL** | - | - | 117.42 (97.92-138.89) | 152.31 | - | 86.90 (77.10-102.72) |
| **EL/ICL** | - | - | 1.52 (1.37-1.68) | 1.15 | 0.63-1.25 | 1.35 (1.13-1.52) |
| **EL/VAL** | - | - | 3.13 (2.25-3.99) | 5.49 | - | 5.63 (4.72-5.84) |
| **BL/EL** | - | - | 7.14 (6.03-8.87) | 4.67 | - | 6.23 (6.06-6.55) |
|  |  |  |  |  |  |  |
| ***Females (n)*** | 6 |  | 10 | 10 | 10 | 10 |
| **Body length** | 26.37 (17.65–34.32) | 36.00-38.00 | 31.6 (25.44-41.23) | 31.6 (27-37) | 15.25–18.77 (16.64) | 21.54 (17.20-25.15) |
| **Maximum body width** | 0.68 (0.52–0.78) | - | 0.94 (0.66-1.16) | 0.82 (0.7-0.9) | 0.32–0.50 (0.40) | 0.51 (0.43-0.72) |
| **Nerve ring (dae)** | 0.43 (0.30–0.61) | - | 0.58 (0.50-0.68) | 0.40-0.475 | 0.30–0.39 (0.36) | 0,40 (0,32-0,45) |
| **Deirids (dae)** | - | - | 0.65 (0.58-0.79) | 0.46-0.55 | - | 0,49 (0,39-0,58) |
| **Esophagous length** | 3.35 (2.34–4.16) | - | 3.24 (1.52-3.95) | 4.50-3.625 | 2.50–3.81 (2.96) | 3,12 (2,75-3,72) |
| **Intestinal caecum length** | 2.83 (1.69–3.77) | - | 2.13 (1.30-2.86) | 3.70-4.25 | 1.60–2.10 (1.90) | 2,05 (1,81-2,32) |
| **Ventricle length** | - | - | 0.25 (0.14-0.28) | 0.19-0.23 | 0.02–0.07 (0.04) | 0,08 (0,05-0,11) |
| **Ventricular appendix length** | 0.53 (0.43–0.66) | - | 0.70 (0.57-0.91) | 0.62-0.92 | 0.40–0.61 (0.49) | 0,55 (0,43-0,66) |
| **Vulva (dae)** | 16.60 (10.40–22.09) | - | 9.26 (8.25-10.87) | 8.32-8.45 | 6.57–8.48 (7.86) | 8,25 (7,62-8,87) |
| **Tail length** | 0.22 (0.16–0.30) | - | 0.39 (0.28-0.58) | 0.25 (0.12-0.30) | 0.17–0.25 (0.22) | 0,27 (0,21-0,32) |
| **Embryonated egg length** | 0.046 (0.039–0.051) | - | 0.068 (0.063-0.071) | 0.050 (0.047-0.057) | - | 0,61 (0,58-0,69) |
