# Supplementary material for: Unveiling the phylogeny of Contracaecum jorgei (Nematoda, Anisakidae) parasitizing Ardea cocoi (Aves, Ardeidae) in Argentina based on an integrative analysis
Source: Research Square preprint supplement (doi:10.21203/rs.3.rs-4450708/v1), 2024-06-07
Supplement: Supplementary file 6 [file f03084bcf0c0190a77eef6f1.docx]

**Table 3a:** Uncorrected p-distances of the SSrRNA mitochondrial gene among *Contracaecum* spp. used in this study and expressed in percentage. New reported sequences in bold.

|  |  | **1** | 2 | 3 | 4 | 5 | 6 | 7 | 8 |
| --- | --- | --- | --- | --- | --- | --- | --- | --- | --- |
| **1** | ***C. jorgei*** |  |  |  |  |  |  |  |  |
| 2 | *C. ogmorhini* | **15** |  |  |  |  |  |  |  |
| 3 | *C. rudolphii* | **16** | 3 |  |  |  |  |  |  |
| 4 | *C. chubutensis* | **16** | 4 | 5 |  |  |  |  |  |
| 5 | *Contracaecum* sp. | **17** | 6 | 6 | 4 |  |  |  |  |
| 6 | *C. australe* | **17** | 6 | 5 | 3 | 1 |  |  |  |
| 7 | *C. pelagicum* | **17** | 8 | 8 | 6 | 6 | 6 |  |  |
| 8 | *C. microcephalum* | **14** | 10 | 10 | 12 | 12 | 12 | 12 |  |
